# Supplementary material for: Electronic and optical absorption properties of organic–inorganic perovskites as influenced by different long-chain diamine molecules: first-principles calculations
Source: Royal Society of Chemistry journal article supplement (doi:10.1039/c9ra03042e), 2019-01-01
Supplement: c9ra03042e1.pdf [file c9ra03042e1.pdf]

## Electronic properties of organic-inorganic perovskites controlled by different diamine long chain organic molecules: first-principles calculations

Wangzhe Zhou, Dan Li\*, Di Zhang, Hu Tang, He Zhang, Chunjun Liang\*

*Department of Physics, Beijing Jiaotong University, Beijing 1001044, People's Republic of China*

### Supporting Information

In order to further study the effect of molecular chain length on the properties of perovskites, we also introduced  $(\text{NH}_3(\text{CH}_2)_2\text{NH}_3)\text{PbI}_4$  (EDAPbI<sub>4</sub>),  $(\text{NH}_3(\text{CH}_2)_4\text{NH}_3)\text{PbI}_4$  (HDAPbI<sub>4</sub>). We calculated their properties in the same way as in the body part. The optimized structure of EDAPbI<sub>4</sub> and HDAPbI<sub>4</sub> is shown in the Fig. S1. We can see that the Pb-I bond in EDAPbI<sub>4</sub> is significantly distorted. The two Pb-I bonds in the c direction deviate from the same straight line. This is due to the fact that the molecular chains are shorter, the spacing of the inorganic layers is significantly reduced, and the I atoms are mutually exclusive. At the same time, the symmetry of the two Pb-I bonds in the a direction is also seriously degraded, which can be seen from the difference in bond length (3.54 Å and 3.04 Å).

The energy band structure (Fig. S2) of EDAPbI<sub>4</sub> and HDAPbI<sub>4</sub> still has similar band dispersion near VBM and CBM with BDAPbI<sub>4</sub> perovskites. Moreover, EDAPbI<sub>4</sub> has a wider band gap (2.30eV) due to the influence of structural distortion on symmetry. And HDAPbI<sub>4</sub> still has a narrow direct band gap (2.03eV), but slightly larger than that of BDAPbI<sub>4</sub>. In particular, the energy band curve of VBM of EDAPbI<sub>4</sub> and HDAPbI<sub>4</sub> appears to be relatively flat and the dispersion is small. The reason is that in EDAPbI<sub>4</sub>, the larger position distortion of I atoms in the two adjacent inorganic layers in the c direction, and in DPAPbI<sub>4</sub>, the increase of the distance between I atoms in the two adjacent

inorganic layers in the c direction due to the increase of molecular chain length. These all lead to a reduction in the overlap of valence electron functions between I atoms. Therefore, the valence band dispersion of diamino-3D perovskite formed by too short and too long diamino molecules is relatively small, which is not conducive to obtaining the best carrier transport properties.

The results of bader charge analysis (Table S1) and charge density difference (Fig. S3) are consistent with the analysis of the body part. HDAPbI<sub>4</sub> shows better ionicity, but still weaker than BDAPbI<sub>4</sub>.

The optical absorption coefficient of EDAPbI<sub>4</sub> and HDAPbI<sub>4</sub> reflects the obvious anisotropy (Fig. S4). Unlike the other materials in which the absorption curves in the lattice vectors a and b directions are very close, the absorption in the a and b directions of EDAPbI<sub>4</sub> shows a significant difference, which is consistent with its structural asymmetry.

In summary, for the diamino-3D perovskite, distortion occurs when the molecular chain length is too short. When the molecular chain is longer, the spacing of the inorganic layers is getting larger and larger, the property gradually tends to 2D perovskite. Therefore, BDAPbI<sub>4</sub> has the most excellent transport properties of carrier due to its suitable molecular chain length and symmetry of even molecular chains.

|                  |        | EDAPbI <sub>4</sub> |        | HDAPbI <sub>4</sub> |    |        |
|------------------|--------|---------------------|--------|---------------------|----|--------|
| <b>Organic</b>   | -1.444 | C                   | -1.122 | -1.467              | C  | -1.114 |
|                  |        | H                   | -6.182 |                     | H  | -6.252 |
|                  |        | N                   | 6.013  |                     | N  | 5.899  |
| <b>Inorganic</b> | 1.444  | Pb                  | -1.115 | 1.467               | Pb | -1.113 |
|                  |        | I                   | 2.559  |                     | I  | 2.579  |

Table S1 Bader charge analysis. Negative values indicate loss of electrons, positive values indicate that electrons are obtained.

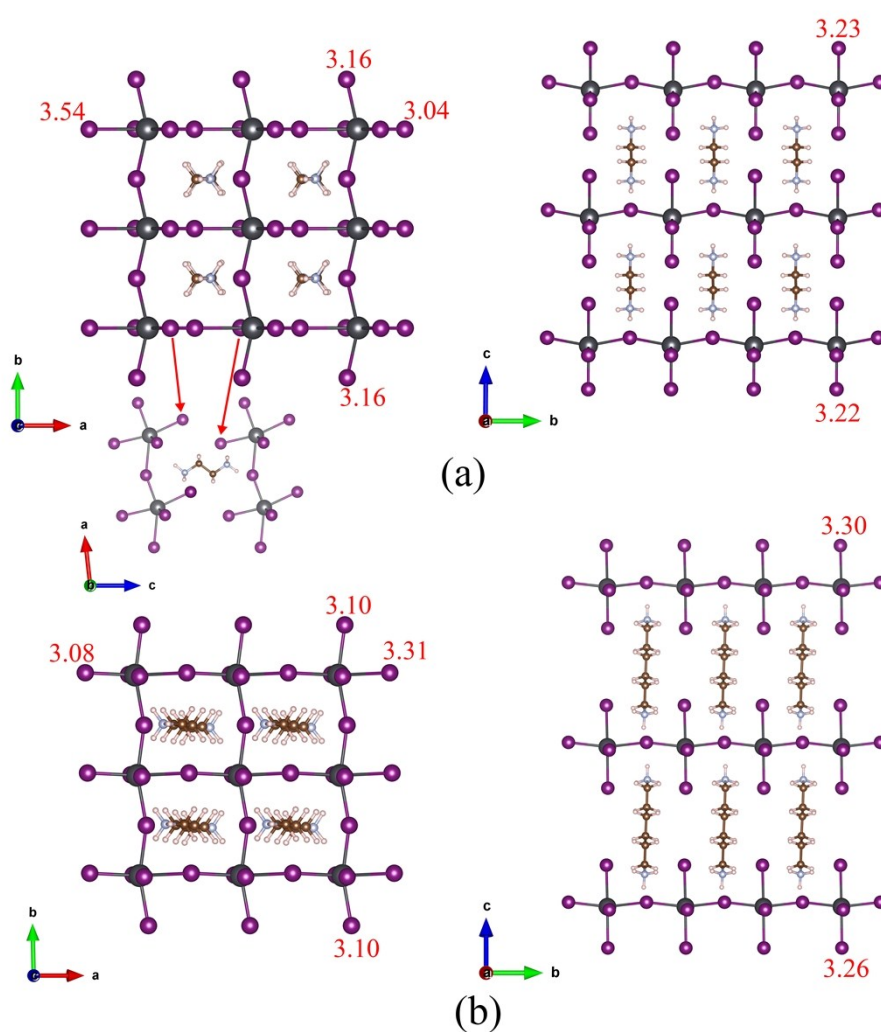

Fig. S1 The optimized geometrical structures of (a) EDAPbI<sub>4</sub>, (b) HDAPbI<sub>4</sub> perovskite.

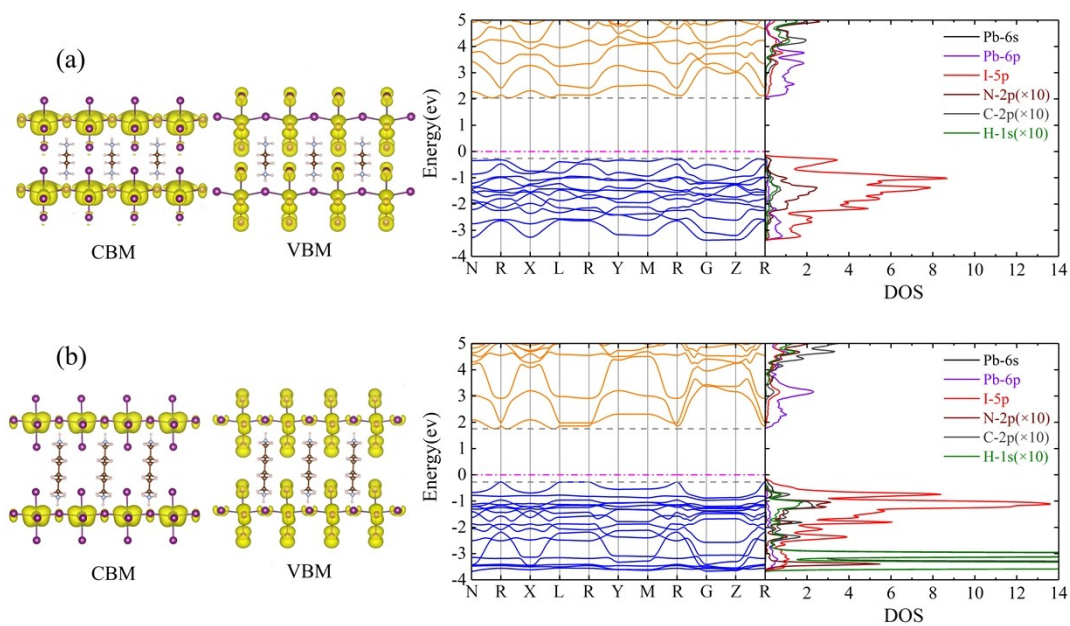

Fig. S2 From left to right, there is densities at the VBM and CBM states (with an isosurface value of  $0.0001e/\text{\AA}^3$ ), energy band structure and density of states (DOS) of (a) EDAPbI<sub>4</sub>, (b) HDAPbI<sub>4</sub>. And “C-2p”, ”N-2p” and ”H-1s” are increased ten times in the original value.

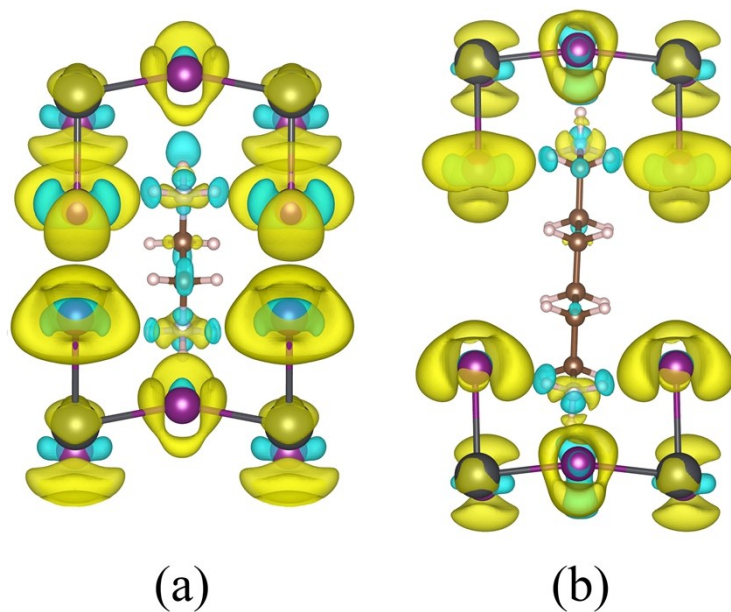

Fig. S3 Charge density difference of (a) EDAPbI<sub>4</sub>, (b) HDAPbI<sub>4</sub> with an isosurface value of  $0.0015e/\text{\AA}^3$ . The yellow part indicates that electrons are obtained, and the blue part indicates electron loss.

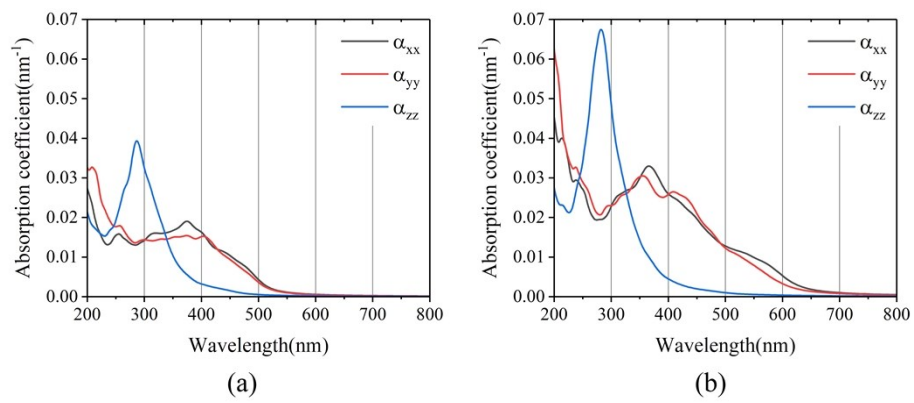

Fig. S4 Absorption coefficients of (a) EDAPbI<sub>4</sub>, (b) HDAPbI<sub>4</sub>.
